# Supplementary material for: Emerging fungal threats to animal, plant and ecosystem health
Source: Springer Nature journal article supplement (doi:10.1038/nature10947), 2012-04-01
Supplement: 41586_2012_BFnature10947_MOESM62_ESM.pdf [file 41586_2012_BFnature10947_MOESM62_ESM.pdf]

| Crop<br><i>Host species</i>            | 2009/2010<br>harvest<br>(million<br>tonnes) | Calories per<br>100g flour (un-<br>cooked) | Disease/Pathogen<br>and variation in %<br>losses               | Loss of food*<br>for x million<br>over 1 year,<br>given diet of<br>2,000 calories<br>per day |
|----------------------------------------|---------------------------------------------|--------------------------------------------|----------------------------------------------------------------|----------------------------------------------------------------------------------------------|
| Rice<br><i>Oryza sativa</i>            | 701 harvest but<br>476* milled for<br>food  | 325                                        | Rice Blast<br><br><i>Magnaporthe<br/>oryzae</i><br>10-35%      | 212 to 742                                                                                   |
| Wheat<br><i>Triticum<br/>aestivum</i>  | 679 harvest<br>but 432* for<br>food         | 341                                        | Stem Rust<br><br><i>Puccinia<br/>graminis</i><br>10-70%        | 202 to 1,413                                                                                 |
| Maize<br><i>Zea mays</i>               | 820 harvest but<br>271* for food            | 355                                        | Corn Smut<br><br><i>Ustilago<br/>maydis</i><br>2-20%           | 26 to 262                                                                                    |
| Potato<br><i>Solanum<br/>tuberosum</i> | 333* harvest but<br>for food                | 357                                        | Late Blight<br><br><i>Phytophthora<br/>infestans</i><br>5-78%  | 81 to 1,270                                                                                  |
| Soybean<br><i>Glycine max</i>          | 232 harvest but<br>148* for food            | 372                                        | Soybean Rust<br><br><i>Phakospora<br/>pachyrhizi</i><br>10-80% | 75 to 600                                                                                    |
|                                        |                                             |                                            |                                                                | TOTAL: Could<br>feed 596 – 4,287<br>million mouths<br>per annum**                            |

**Table S1: Food security and crop losses due to fungal/oomycete diseases:** Five major crops that feed the world's population are challenged by the fungal/oomycete diseases shown. All global harvests are from 2009/2010 ([www.fao.org](http://www.fao.org) or FAOSTAT1). \*Figures are estimates and are based on 100% of milled rice and 100% of potato harvest being used for human consumption. However, 34% of the global wheat harvest is produced in developing countries, of which 100% is assumed to be used for human food, but only 45% of the total wheat harvest produced from developed countries is used for human food (the rest is used as animal feed and biofuel). Of the global maize harvest, 32% is produced in developing countries and 100% is assumed to be used for food and in the US 2.5% of their total harvest of 333m tonnes of maize (41% of global harvest) is used directly as food. Of the global soybean harvest, 36% is from US and Canada (10% of this is used as food, the rest goes into processed food and animal feed) and 64% is produced in developing nations, where 100% is assumed to be used as food. These figures do not take into account post-harvest storage losses.

\*\*This is 8.5% - 61.2% of the world's population, based on the 2011 population estimate of 7 billion people.

| Database     | Year | Animal fungal alerts | Plant fungal alerts | Total fungal alerts | Total EID alerts |
|--------------|------|----------------------|---------------------|---------------------|------------------|
| HealthMap    | 2007 | 9                    | 9                   | 18                  | 9369             |
| HealthMap    | 2008 | 13                   | 20                  | 33                  | 5659             |
| HealthMap    | 2009 | 8                    | 15                  | 23                  | 11284            |
| HealthMap    | 2010 | 23                   | 29                  | 52                  | 8672             |
| HealthMap    | 2011 | 28                   | 18                  | 46                  | 8674             |
| <b>Total</b> |      | <b>81</b>            | <b>91</b>           | <b>172</b>          | <b>43658</b>     |
| ProMED       | 1995 | 6                    | 5                   | 11                  | 1153             |
| ProMED       | 1996 | 10                   | 11                  | 21                  | 1923             |
| ProMED       | 1997 | 9                    | 20                  | 29                  | 2384             |
| ProMED       | 1998 | 20                   | 12                  | 32                  | 2357             |
| ProMED       | 1999 | 14                   | 22                  | 36                  | 2079             |
| ProMED       | 2000 | 7                    | 37                  | 44                  | 2002             |
| ProMED       | 2001 | 21                   | 46                  | 67                  | 1930             |
| ProMED       | 2002 | 14                   | 41                  | 55                  | 1894             |
| ProMED       | 2003 | 6                    | 47                  | 53                  | 2092             |
| ProMED       | 2004 | 2                    | 64                  | 66                  | 2382             |
| ProMED       | 2005 | 10                   | 108                 | 118                 | 2582             |
| ProMED       | 2006 | 18                   | 62                  | 80                  | 2374             |
| ProMED       | 2007 | 21                   | 111                 | 132                 | 2829             |
| ProMED       | 2008 | 19                   | 123                 | 142                 | 2251             |
| ProMED       | 2009 | 24                   | 144                 | 167                 | 2399             |
| ProMED       | 2010 | 37                   | 142                 | 179                 | 2586             |
| ProMED       | 2011 | 40                   | 66                  | 106                 | 2307             |
| <b>Total</b> |      | <b>278</b>           | <b>1061</b>         | <b>1338</b>         | <b>37524</b>     |

**Table S2.** Summary of HealthMap (2006-2011) and ProMed (1994-2011) alerts for mycoses with the first year of data collection excluded. For our analyses we downloaded the complete ProMED and HealthMap databases from the start of data collection through to the last year of complete data collection (2010). We then used Boolean searches of the database using generic fungal search terms (fung\*, mycosis) and refined this with the following specific search terms (rust, blast, blight, wilt, sigatoka, bunt, smut, light leaf spot, jarrah, oak death, blue stain, aspergillosis, blastomycosis, cryptococcosis, foot fungus, histoplasmosis, mucormycosis, paracoccidioidomycosis, sporotrichosis, thrush, valley fever, white nose syndrome, fusarium keratitis, dermatophytosis, zygomycosis, basidiobolomycosis, chromoblastomycosis, lobomycosis, mycetoma). Records were subsequently curated to remove false positives.

**Table S3**

Published infectious disease-driven extinction and regional extirpation events across animal and plant taxa. Data was acquired from the following review sources [1-9] and from *Web of Science* literature searches.

| Host species <sup>§</sup>                                                                              | Pathogen species                      | Kingdom (Phylum)                            | Factors driving emergence                    | Year of occurrence                   | Reference |
|--------------------------------------------------------------------------------------------------------|---------------------------------------|---------------------------------------------|----------------------------------------------|--------------------------------------|-----------|
| Tropical central American amphibian spp. (30 species and 4 families)<br>EXTINCTION/EXTIRPATION         | <i>Batrachochytrium dendrobatidis</i> | Fungi (Chytridiomycota)                     | Pathogen invasion/endemic host populations   | late 1980's - present                | [7, 10]   |
| Australian amphibian spp. ( <i>n</i> ~ 4; 2 families)<br>EXTINCTION                                    | <i>B. dendrobatidis</i>               | Fungi (Chytridiomycota)                     | Pathogen invasion/endemic host population    | early 1980's                         | [11, 12]  |
| <i>Alytes obstetricans</i> (Common midwife toad)<br>EXTIRPATION                                        | <i>B. dendrobatidis</i>               | Fungi (Chytridiomycota)                     | Pathogen invasion/endemic host population    | 1997                                 | [13]      |
| <i>Nextophrynoides asperginis</i> (Kihansi spray toad)<br>EXTINCTION                                   | <i>B. dendrobatidis</i>               | Fungi (Chytridiomycota)                     | Pathogen / habitat modification              | 2003                                 | [14]      |
| <i>Leptodactylus fallax</i> (Dominica and Montserrat Mountain Chicken Frog)<br>EXTIRPATION             | <i>B. dendrobatidis</i>               | Fungi (Chytridiomycota)                     | Pathogen invasion/endemic host population    | 2000 (Dominica)<br>2009 (Montserrat) | [15, 16]  |
| <i>Myotis lucifugus</i> (little brown bat)<br>EXTIRPATION*                                             | <i>Geomyces destructans</i>           | Fungi (Ascomycota)                          | Pathogen invasion?                           | ~2006                                | [17, 18]  |
| <i>Partula turgida</i> (Hawaiian tree snail)<br>EXTINCTION                                             | <i>Steinhausia</i> sp.                | Fungi (Microsporidia)                       | Pathogen invasion/endemic host population    | 1996                                 | [19]      |
| Native European Crayfish (eg. white clawed crayfish <i>Austropotamobius pallipes</i> )<br>EXTIRPATION* | <i>Aphanomyces astaci</i>             | Protoctista (Oomycota)                      | Pathogen invasion/spill-over                 | ~1970's                              | [20, 21]  |
| <i>Lottia alveus</i> (Eelgrass limpet)<br>EXTINCTION                                                   | <i>Labyrinthula zosterae</i>          | Protoctista (Slime molds; Heterokontophyta) | Knock-on effect of pathogen-driven food loss | ~1930                                | [22]      |

|                                                                                                              |                                             |                                                                 |                                                                                   |                    |          |
|--------------------------------------------------------------------------------------------------------------|---------------------------------------------|-----------------------------------------------------------------|-----------------------------------------------------------------------------------|--------------------|----------|
| Hawaiian native Land Birds<br>~ 9 (Table 7, van Riper <i>et al.</i><br>1986)<br>EXTINCTION                   | Avian malaria?                              | Protoctista<br>( <i>Apicomplexa</i> –<br><i>Plasmodium</i> sp.) | Pathogen<br>invasion and<br>habitat loss                                          | ~1830 -<br>2002    | [23]     |
| <i>Sarcophilus harrisii</i><br>(Tasmanian Devil)<br>EXTIRPATION*                                             | Tasmanian devil<br>facial tumour<br>disease | Mammalian<br>infectious cancer                                  | Frequency-<br>dependent<br>contact; low host<br>genetic<br>diversity(?)           | 1996               | [24]     |
| <i>Mustela nigripes</i> (Black<br>footed ferret)<br>EXTIRPATION                                              | Canine distemper<br>virus (CDV)             | ssRNA Virus<br>(genus<br>Morbillivirus)                         | Pathogen spill-<br>over from<br>unknown vector                                    | 1985               | [25]     |
| <i>Lycaon pictus</i> (African Wild<br>Dog)<br>EXTIRPATION                                                    | Canine distemper<br>virus (CDV)             | ssRNA Virus<br>(genus<br>Morbillivirus)                         | Pathogen spill-<br>over from<br>domesticated<br>dogs                              | ~1960 -<br>present | [26, 27] |
| <i>Rattus macleari</i><br>(Christmas Island rat)<br>EXTINCTION(?)                                            | <i>Trypanosoma</i><br><i>lewisii</i> ?      | Protoctista<br>(Euglenozoa)                                     | Pathogen spill-<br>over following<br>introduction of <i>R.</i><br><i>rattus</i> ? | ~1905              | [28]     |
| <i>Castanea dentata</i> (Chestnut<br>trees)<br>EXTIRPATION                                                   | <i>Cryphonectria</i><br><i>parasitica</i>   | Fungi<br>(Ascomycota)                                           | Pathogen<br>invasion                                                              | ~1900 -<br>~1930   | [29]     |
| <i>Ulmus</i> spp.<br>(Elm trees)<br>EXTIRPATION                                                              | <i>Ophiostoma ulmi</i>                      | Fungi<br>(Ascomycota)                                           | Pathogen<br>invasion,<br>recombination                                            | ~1910              | [30]     |
| Jarrah dieback (multiple<br>species of <i>Eucalyptus</i> and<br>Proteaceae)<br>EXTIRPATION/<br>EXTINCTION(?) | <i>Phytophthora</i><br><i>cinnamomi</i>     | Protoctista<br>(Oomycota)                                       | Pathogen<br>invasion                                                              | 1935               | [31]     |
| <i>Pinus radiata</i> (Monterey<br>pine)<br>EXTIRPATION(?)                                                    | <i>Fusarium</i><br><i>circinatum</i>        | Fungi<br>(Ascomycota)                                           | Pathogen<br>invasion                                                              | 1946               | [32]     |
| Sudden oak death syndrome<br>(multiple species)<br>EXTIRPATION(?)                                            | <i>Phytophthora</i><br><i>ramorum</i>       | Protoctista<br>(Oomycota)                                       | Pathogen<br>invasion                                                              | ~1995              | [33]     |

|                                                                               |                                    |                                            |          |       |      |
|-------------------------------------------------------------------------------|------------------------------------|--------------------------------------------|----------|-------|------|
| <i>Torreya taxifolia</i> (Florida torreyi)<br>EXTINCTION* (~99% decline)      | <i>Pestalotiopsis microspora</i> ? | Fungi (Ascomycota)                         | Unknown. | ~1950 | [34] |
| <i>Zostera marina</i> and <i>Zostera caulescens</i> (Eelgrass)<br>EXTIRPATION | <i>Labyrinthula zosterae</i>       | Protoctista (Slime mold; Heterokontophyta) | Unknown  | ~1930 | [35] |

**Note:** We only include species where there is published evidence of extinction/extirpation, or published evidence of declines with a high likelihood of future loss. Many EIDs did not meet these strict criteria despite causing high levels of population decline (e. g. bird West Nile Virus, Red squirrel parapox virus, Prairie dog plague). \* indicates species where extirpation or extinction is predicted based on projections of future population viability. (?) indicates that data is persuasive but deficient

**Table S4.1**

Data for Fig. 1. Summary of major taxonomic groups of pathogens that cause animal species extinctions/extirpations from Table S1

| <b>Taxonomic groups of pathogens</b> | <b>Disease-driven extinction/ extirpation events (% of total)</b> | <b>Corrected for community-level extinctions (% of total)</b> |
|--------------------------------------|-------------------------------------------------------------------|---------------------------------------------------------------|
| Fungi                                | 39 (72.0)                                                         | 11 (64.7)                                                     |
| Protist                              | 12 (22.0)                                                         | 3 (17.6)                                                      |
| Viruses                              | 2 (3.7)                                                           | 2 (11.7)                                                      |
| Bacteria                             | 0 (0)                                                             | 0 (0)                                                         |
| Helminths                            | 0 (0)                                                             | 0 (0)                                                         |
| others*                              | 1 (1.9)                                                           | 1 (5.88)                                                      |

\*Note: 'Others' includes mammalian carcinogenic cell lines and prions

**Table S4.2**

Data for Fig. 1. Summary of major taxonomic groups of pathogens that cause plant species extinctions/extirpations from Table S1

| <b>Taxonomic groups of pathogens</b> | <b>Disease-driven extinction/ extirpation events</b> | <b>Corrected for community-level extinctions</b> |
|--------------------------------------|------------------------------------------------------|--------------------------------------------------|
| Fungi                                | 4 (57.1)                                             | 4 (57.1)                                         |
| Protist                              | 3 (42.8)                                             | 3 (42.8)                                         |
| Viruses                              | 0 (0)                                                | 0 (0)                                            |
| Bacteria                             | 0 (0)                                                | 0 (0)                                            |
| Helminths                            | 0 (0)                                                | 0 (0)                                            |
| others*                              | n/a                                                  | n/a                                              |

| Disease                           | Pathogen                        | Host range                                      | Regional losses <sup>1</sup>                                                      | Regional losses of absorbed CO <sub>2</sub> (megatonnes) <sup>2,3</sup> |
|-----------------------------------|---------------------------------|-------------------------------------------------|-----------------------------------------------------------------------------------|-------------------------------------------------------------------------|
| Dutch Elm                         | <i>Ophiostoma ulmi</i>          | Elm                                             | 25 million elms (UK, 1990's)<br>77 million elms (USA, by 2001)                    | 0.395 <sup>2</sup> to 1 <sup>3</sup>                                    |
| Chestnut blight                   | <i>Cryphonectria parasitica</i> | Chestnut                                        | 3.5 billion US chestnuts (USA, by 1940's)                                         | 13.8 to 35                                                              |
| Sudden oak death / ramorum blight | <i>Phytophthora ramorum</i>     | Oak, larch etc.                                 | 1.4 million oaks in California<br>Pre-emptive cull of 4 million larches (UK 2011) | 0.012 to 0.05                                                           |
| 'Jarrah' dieback                  | <i>Phytophthora cinnamomi</i>   | 2,000 of 9,000 native spp. in Western Australia | 1 million hectares of western Australia (by 2009)                                 | 9 to 23                                                                 |
| Pine beetle / blue stain          | <i>Grossmania clavigera</i>     | Lodge pole pine                                 | 16.3 million hectares of western Canada (by 2011)                                 | 207 - 520                                                               |
|                                   |                                 |                                                 |                                                                                   | TOTAL: ~ 230 to 580 megatonnes                                          |

**Table S5. Tree carbon sequestration losses caused by fungal/oomycete diseases**

Regional losses<sup>1</sup> are given as trees felled/succumb to disease and resulting losses in CO<sub>2</sub> absorption for 5 different fungal/oomycete pathogens. Such regional losses determined for total number of lost trees estimated over period stated, with minimum<sup>2</sup> and maximum<sup>3</sup> estimates based on either <sup>2</sup> carbon sequestration data-base at Office of Sustainability, Tufts University US (with 25 -120 year old trees is 2.52 lbs to 5.58 lbs CO<sub>2</sub> per year per tree: 25 – 120 year old pines is 15 – 11.7 lbs CO<sub>2</sub> per year: crude mean of values is 3.95 Kg CO<sub>2</sub> per tree per year) or on the assumption<sup>3</sup> that one broad-leaved tree will absorb around 0.01 tonne of CO<sub>2</sub> per annum [36]. Estimates for losses due to *Phytophthora cinnamomi* are based on a eucalyptus planting density of 2300 trees per hectare [37]. Pine beetle/blue stain losses are based on a pine planting density of 1400 trees per hectare. We note that we have not evaluated losses owing to timber decay as a result of tree death. Atmospheric CO<sub>2</sub> levels (December 2011, <http://co2now.org/>) were recorded at 391.80 ppm or 834.5 Gigatonnes; maximum regional losses recorded herein equate with 0.069% global CO<sub>2</sub>

## References

1. Anderson, P.K., et al., *Emerging infectious diseases of plants: pathogen pollution, climate change and agrotechnology drivers*. Trends in Ecology & Evolution, 2004. **19**(10): p. 535-544.
2. Daszak, P. and C.A. A., *Extinction by infection*. Trends in Ecology and Evolution, 1999. **14**(7): p. 279.
3. Daszak, P., et al., *Emerging infectious diseases and amphibian population declines*. Emerging Infectious Diseases, 1999. **5**: p. 735-748.
4. Daszak, P., A.A. Cunningham, and A.D. Hyatt, *Emerging infectious diseases of wildlife - Threats to biodiversity and human health*. Science, 2000. **287**: p. 443-449.
5. Jones, K.E., et al., *Global trends in emerging infectious diseases*. Nature, 2008. **451**(7181): p. 990-3.
6. Harvell, C.D., et al., *Ecology - Climate warming and disease risks for terrestrial and marine biota*. Science, 2002. **296**(5576): p. 2158-2162.
7. Wake, D.B. and V.T. Vredenburg, *Are we in the midst of the sixth mass extinction? A view from the world of amphibians*. Proceedings of the National Academy of Sciences of the United States of America, 2008. **105**: p. 11466-11473.
8. Stuart, S.N., et al., *Status and trends of amphibian declines and extinctions worldwide*. Science, 2004. **306**(5702): p. 1783-6.
9. Smith, K.F., D.F. Sax, and K.D. Lafferty, *Evidence for the role of infectious disease in species extinction and endangerment*. Conservation Biology, 2006. **20**(5): p. 1349-1357.
10. Crawford, A.J., K.R. Lips, and E. Bermingham, *Epidemic disease decimates amphibian abundance, species diversity, and evolutionary history in the highlands of central Panama*. Proceedings of the National Academy of Sciences of the United States of America, 2010. **107**(31): p. 13777-13782.
11. Campbell, A., *Declines and disappearances of Australian frogs*. 1999, Canberra: Environment Australia. 234 p.
12. Schloegel, L.A., et al., *The decline of the sharp-snouted day frog (Taudactylus acutirostris): The first documented case of extinction by infection in a free-ranging wildlife species? (vol 3, pg 35, 2006)*. Ecohealth, 2006. **3**(2): p. 122-122.
13. Bosch, J., I. Martínez-Solano, and M. García-París, *Evidence of a chytrid fungus infection involved in the decline of the common midwife toad (Alytes obstetricans) in protected areas of central Spain*. Biological Conservation, 2001. **97**: p. 331-337.
14. Channing, A., et al., *The biology and recent history of the critically endangered Kihansi spray toad Nectrophrynoides asperginis in Tanzania*. Journal of East African Natural History., 2006. **95**(2): p. 117-138.
15. McIntyre, S., *The current status of the mountain chicken Leptodactylus fallax on Dominica, eastern Caribbean: an amphibian in decline*. MSc thesis, University of East Anglia, Norwich, UK., 2003.
16. Black, R., *Fungus devastates 'chicken' frog*. <http://news.bbc.co.uk/1/hi/sci/tech/7948124.stm>, 2009 (accessed 2011).
17. Blehert, D.S., et al., *Bat White-Nose Syndrome: An Emerging Fungal Pathogen?* Science, 2009. **323**(5911): p. 227-227.
18. Frick, W.F., et al., *An Emerging Disease Causes Regional Population Collapse of a Common North American Bat Species*. Science, 2010. **329** (5992): p. 679-682.
19. Cunningham, A.A. and P. Daszak, *Extinction of a Species of Land Snail Due to Infection with a Microsporidian Parasite*. Conservation Biology, 1998. **12**(5): p. 1139-1141.



20. Alderman, D.J., *Geographical spread of bacterial and fungal diseases of crustaceans*. Revue Scientifique Et Technique De L Office International Des Epizooties, 1996. **15**(2): p. 603-632.
21. Alderman, D.J., D. Holdich, and I. Reeve, *Signal Crayfish as Vectors in Crayfish Plague in Britain*. Aquaculture, 1990. **86**(1): p. 3-6.
22. Carlton, J.T., et al., *The 1st Historical Extinction of a Marine Invertebrate in an Ocean-Basin - the Demise of the Eelgrass Limpet Lottia-Alveus*. Biological Bulletin, 1991. **180**(1): p. 72-80.
23. Van Riper III, C. and S.G. Van Riper, *The epizootiology and ecological significance of malaria in Hawaiian land birds*. Ecological Monographs, 1986. **56**(4): p. 327-344.
24. McCallum, H., et al., *Transmission dynamics of Tasmanian devil facial tumor disease may lead to disease-induced extinction*. Ecology, 2009. **90**(12): p. 3379-3392.
25. Williams, E.S., et al., *Canine-Distemper in Black-Footed Ferrets (Mustela-Nigripes) from Wyoming*. Journal of Wildlife Diseases, 1988. **24**(3): p. 385-398.
26. Macdonald, D.W., *Cause of Wild Dog Deaths*. Nature, 1992. **360**(6405): p. 633-634.
27. Haydon, D.T., et al., *Development of vaccination strategies for the management of rabies in African wild dogs*. Biological Conservation, 2006. **131**(2): p. 180-192.
28. Wyatt, K.B., et al., *Historical Mammal Extinction on Christmas Island (Indian Ocean) Correlates with Introduced Infectious Disease*. Plos One, 2008. **3**(11).
29. Milgroom, M.G., et al., *Intercontinental population structure of the chestnut blight fungus, Cryphonectria parasitica*. Mycologia, 1996. **88**(2): p. 179-190.
30. Brasier, C.M., *Rapid evolution of introduced plant pathogens via interspecific hybridization*. Bioscience, 2001. **51**(2): p. 123-133.
31. Wills, R.T., *The Ecological Impact of Phytophthora cinnamomi in the Stirling Range National Park, Western Australia*. Australian Journal of Ecology, 1993. **18**(2): p. 145-159.
32. Gordon, T.R., A.J. Storer, and D.L. Wood, *The pitch canker epidemic in California*. Plant Disease, 2001. **85**(11): p. 1128-1139.
33. McPherson, B.A., et al., *Sudden oak death in California: Disease progression in oaks and tanoaks*. Forest Ecology and Management, 2005. **213**(1-3): p. 71-89.
34. Schwartz, M.W., S.M. Hermann, and P.J. van Mantgem, *Estimating the magnitude of decline of the Florida torreya (Torreya taxifolia Arn.)*. Biological Conservation, 2000. **95**(1): p. 77-84.
35. Muehlstein, L.K., D. Porter, and F.T. Short, *Labyrinthula-Zosteriae Sp-Nov, the Causative Agent of Wasting Disease of Eelgrass, Zostera-Marina*. Mycologia, 1991. **83**(2): p. 180-191.
36. Nowak, D.J. and D.E. Crane, *Carbon storage and sequestration by urban trees in the USA*. Environmental Pollution, 2002. **116**(3): p. 381-389.
37. Koch, J.M. and S.C. Ward, *Growth of jarrah on rehabilitation of bauxite mines in SW Australia in 13 years*. Australian Forests, 2005. **68**: p. 176-185.
